# Supplementary material for: 3D Printing and Mind Mapping in Clinical Orthopedic Nursing Education: A Comparative Randomized Controlled Trial
Source: Research Square preprint supplement (doi:10.21203/rs.3.rs-6095564/v1), 2025-04-29
Supplement: Supplementary file 2 [file e9f86b72eeb14e71129dd7d4.docx]

## Pelvic Fracture Nursing Technical Operation Standards and Protocols

## Ward Name Score Preceptor’s Signature Date

| **Item** | **Procedure** | **Points** | **Deduction Reasons** | **Deduction** |
| --- | --- | --- | --- | --- |
| Preparations (20 points) | 1. Nurse Preparation: 2. Professional attire: Wear nurse uniform, ID badge; neat hair, no long nails. 3. Hand hygiene: 7-step handwashing, sterile gloves. 4. Master emergency protocols (shock, fat embolism management). | 5 | - Improper attire (-1) - Incorrect hand hygiene (-2) - Unfamiliar with protocols (-2) |  |
| 1. Equipment Preparation: 2. Emergency devices: ECG monitor, oxygen supply, suction, emergency drugs. 3. ursing supplies: Pelvic binder/external fixator, turning pads, skin protectors, thermometer, BP monitor, pain scale. 4. Special items: Urinary catheter kit, IPC devices, traction system. | 10 | - Missing critical equipment (-3) - No turning aids (-2) - Unverified traction function(-2) |  |
| 1. Environment Preparation: 2. Room temperature 22-24°C, humidity 50%-60%. 3. Anti-decubitus mattress, functional bed rails. 4. Dry floors, clear emergency access. | 5 | - Unadjusted environment (-1) - Improper pressure relief setup (-2) - Unresolved safety hazards (-2) |  |
| Assessment Criteria (25 points) | 1. Specialized Assessment: 2. Injury mechanism: Fall/crush history. 3. Fracture classification: Tile (A/B/C) or Young-Burgess system. 4. Complication alerts: Monitor Hb trends (retroperitoneal hematoma), perineal ecchymosis, rectal exam. | 8 | - Unclear injury mechanism (-2) - Incomplete classification (-3) - Missed rectal exam/perineal signs (-3) |  |
| 1. Systemic Assessment: 2. Vital signs: Continuous BP (hemorrhagic shock), RR (fat embolism). 3. Neurologic exam: Lower limb sensation/motion (L5/S1 root injury). 4. Urinary status: Output/color (urethral injury). 5. Pain: NRS scale q4h. | 15 | - Inadequate BP monitoring (-3) - Missed neuro exam (-3) - Incomplete I/O records (-3) - Delayed pain assessment (-3) |  |
| 1. Risk Assessment: 2. DVT risk: Caprini score ≥5 = pharmacologic + mechanical prophylaxis. 3. Pressure injury: Braden score ≤12 = intensified care. 4. Nutritional risk: NRS2002 ≥3 = nutritional support. | 5 | - Non-standard tools (-2) - Unadjusted care plan (-3) |  |
| Key Procedures (40 points) | 1. Immobilization: 2. Pelvic binder: Upper edge at iliac crest, lower at greater trochanter; 2-finger tightness. 3. Positioning: Supine on hard bed, legs abducted 15-20°; no turning (unstable fractures). 4. Traction care: Verify alignment/weight (8-12kg), check pedal pulses. | 12 | - mproper binder placement (-3) - Unauthorized repositioning (-5) - Traction failure (-4) |  |
| 1. Complication: 2. Hemorrhage: Hourly abdominal distension monitoring, document paracentesis. 3. DVT prophylaxis: IPC ≥18h/day, ankle pumps 10x/hour. 4. Pulmonary care: Log-roll q2h (post-stabilization), vibration therapy BID, breathing exercises. 5. Skin care: R-type pads, hydrocolloid dressings, smooth linens. | 15 | - Delayed abdominal monitoring (-4) - Insufficient IPC time (-3) - Missed turns (-4) - No pressure relief (-4) |  |
| 1. Catheter Care: 2. Urinary catheter: Perineal cleaning BID, bag below bladder, monitor urine. 3. Drain care: Document output/character (>200ml/h = report), maintain suction. 4. IV access: Two 18G+ lines (avoid lower limbs). | 8 | - Improper cleaning (-2) - Unreported drainage issues (-3) - Lower limb IV (-3) |  |
| 1. Functional Rehabilitation: 2. Acute phase (days 1-3): Isometric exercises (quadriceps/glutes) 5-10x/set, 3 sets/day. 3. Stable phase (days 4-7): CPM machine (hip/knee ≤30°), breathing training. 4. Recovery phase: Leg raises (15cm ×10s), walker-assisted standing. | 5 | - Incorrect techniques (-2) - Delayed guidance (-3) |  |
| Comprehensive Evaluation (15 points) | 1. Quality Assurance: 2. SBAR compliance: Situation-Background-Assessment-Recommendation handoff. 3. Documentation: Real-time records, medical terminology (such as:“pelvic compression test (+)”). 4. Emergency readiness: Shock positioning, dual IV access, blood prep within 5min. | 10 | - Incomplete handoff (-3) - Delayed records (-2) - Slow response (-5) |  |
| 1. Humanistic Care: 2. Therapeutic communication: “3-step explanation” (purpose-steps-cooperation). 3. Privacy: Screens during perineal care, minimal exposure. 4. Psychological support: SAS screening, CBT interventions. | 5 | - Inadequate education (-2) - Privacy breach (-2) - No psychosocial care (-1) |  |

**Scoring Notes:**

- Deductions per item ≤ its total points. Total score = 100.
- Grading: ≥90 = Excellent; 80-89 = Pass; <80 = Retraining required.
- Time-critical priorities: Hemorrhage control within “Golden 1-Hour,” DVT prophylaxis within “24-hour window,” dynamic reassessment.

## 骨盆骨折护理技术操作规范和标准

## 病区 姓名 得分 带教签名 日期

| **项目** | **操作内容** | **标准**  **分值** | **扣分原因** | **扣分** |
| --- | --- | --- | --- | --- |
| 操作  准备  (10分) | 1. 护士准备： 2. 仪表规范：着护士服、佩戴胸牌，头发整洁，无长指甲 3. 手卫生：七步洗手法规范，佩戴无菌手套 4. 掌握应急预案（休克、脂肪栓塞等并发症处理流程） | 5 | - 仪表不规范扣1分 - 未正确执行手卫生扣2分 - 不熟悉应急流程扣2分 |  |
| 1. 用物准备: 2. 急救设备：心电监护仪、吸氧装置、负压吸引装置、急救药品 3. 护理用物：骨盆固定带/外固定架、翻身垫、皮肤减压贴、体温计、血压计、疼痛评估量表 4. 特殊用物：导尿包、下肢静脉血栓预防装置（IPC）、牵引装置液 | 10 | - 遗漏关键急救设备扣3分 - 未准备翻身辅助用品扣2分 - 未核对牵引装置功能扣2分 |  |
| 1. 环境准备： 2. 病房温度22-24℃，湿度50%-60% 3. 床单位铺防压疮气垫床，护栏功能完好 4. 地面干燥防滑，急救通道无障碍物 | 5 | - 未调节温湿度扣1分 - 未正确放置减压用具扣2分 - 环境安全隐患未处理扣2分 |  |
| 评估  要点  （25分） | 1. 专科评估 2. 损伤机制评估：高处坠落/挤压伤等病史采集 3. 骨折分型评估：Tile分型（A/B/C型）或Young-Burgess分型记录 4. 并发症预警：监测Hb动态变化（警惕腹膜后血肿）、观察会阴部瘀斑、肛门指诊检查 | 8 | - 未询问受伤机制扣2分 - 骨折分型记录不全扣3分 - 未执行肛门指诊或观察会阴体征扣3分 |  |
| 1. 系统评估 2. 生命体征：持续监测血压（警惕失血性休克）、呼吸频率（警惕脂肪栓塞） 3. 神经功能：检查下肢感觉运动（特别是L5/S1神经根损伤表现） 4. 排尿情况：记录尿量、颜色，观察有无血尿（警惕尿道损伤） 5. 疼痛评估：使用数字评分法（NRS）每4小时评估记录 | 15 | - 未动态监测血压变化扣3分 - 遗漏神经功能检查扣3分 - 未规范记录出入量扣3分 - 疼痛评估间隔超时扣3分 |  |
| 1. 风险评估 2. 深静脉血栓风险评估（Caprini评分≥5分需药物+机械预防） 3. 压疮风险评估（Braden评分≤12分需强化干预） 4. 营养风险筛查（NRS2002≥3分需营养支持） | 5 | - 未使用标准化评估工具扣2分 - 未根据评分调整护理计划扣3分 |  |
|  | 1. 制动管理： 2. 骨盆固定带使用：上缘平髂嵴、下缘平股骨大转子，松紧度以能插入两指为宜 |  | - 固定带位置不当扣3分 - 擅自改变体位扣5分 |  |
| 操作  要点  (40分) | 1. 骨盆固定带使用：上缘平髂嵴、下缘平股骨大转子，松紧度以能插入两指为宜 2. 体位摆放：绝对卧硬板床，双下肢外展15-20°中立位，禁止翻身（不稳定骨折急性期） 3. 牵引护理：保持牵引有效性，每日检查牵引力线/重量（一般8-12kg），观察足背动脉搏动 | 12 | - 未检查牵引装置有效性扣4分 |  |
| 1. 并发症的预防: 2. 出血监测：每小时观察腹部膨隆程度、记录腹腔穿刺结果 3. 血栓预防：间歇充气加压装置（IPC）每日使用≥18小时，指导踝泵运动每小时10次 4. 肺部护理：轴线翻身Q2h（稳定后），震动排痰bid，指导深呼吸训练 5. 皮肤护理：使用R型翻身垫，骨突处贴水胶体敷料，保持床单平整 | 15 | - 未按时观察腹部体征扣4分 - 机械预防时间不足扣3分 - 翻身间隔超时扣4分 - 未使用减压敷料扣4分 |  |
| 1. 管路护理： 2. 导尿管护理：每日会阴消毒bid，保持引流袋低于膀胱位置，监测尿液性状 3. 引流管护理：记录引流液量/性质（如出血＞200ml/h需报告），保持负压有效性 4. 输液通路管理：建立两条静脉通道（18G以上），避开下肢静脉 | 8 | - 会阴消毒不规范扣2分 - 未及时报告引流异常扣3分 - 下肢静脉穿刺扣3分 |  |
| 1. 功能康复： 2. 急性期（1-3天）：指导等长收缩训练（股四头肌、臀肌收缩）5-10次/组，3组/日 3. 稳定期（4-7天）：CPM机被动活动髋膝关节（屈曲≤30°），指导呼吸训练 4. 恢复期：直腿抬高训练（离床面15cm维持10秒），使用助行器床旁站立训练 | 5 | - 训练方法错误扣2分 - 未按时指导功能锻炼扣3分 |  |
| 综合  评价  (15分) | 1. 操作质量： 2. 操作流程符合SBAR标准：病情-背景-评估-建议完整交接 3. 记录规范性：护理记录单实时记录，使用医学术语（如"骨盆挤压分离试验（+）"） 4. 应急预案执行：能在5分钟内完成休克体位摆放、建立两条静脉通路、备血等抢救准备 | 10 | - 交接班内容缺失扣3分 - 记录不及时扣2分 - 应急响应超时扣5分 |  |
| 1. 人文关怀： 2. 使用治疗性沟通技巧：解释操作时采用"三步告知法"（目的-步骤-配合要点） 3. 隐私保护：进行会阴护理时使用屏风遮挡，检查时不过度暴露患者 4. 心理支持：运用焦虑自评量表（SAS）筛查，提供疾病认知行为干预 | 5 | - 未履行告知义务扣2分 - 暴露患者隐私扣2分 - 未实施心理干预扣1分 |  |

**评分说明：**

- 每个子项扣分不超过该条目总分值，总分100分。
- 90分以上为优秀，80-89分为合格，低于80分需重新培训考核。
- 本标准特别强调"黄金1小时"内出血控制、"24小时血栓预防时间窗"等时效性要求，需结合动态评估调整护理措施。
