# Supplementary material for: 3D Printing and Mind Mapping in Clinical Orthopedic Nursing Education: A Comparative Randomized Controlled Trial
Source: Research Square preprint supplement (doi:10.21203/rs.3.rs-6095564/v1), 2025-04-29
Supplement: Supplementary file 3 [file eedea4b3e296308f8b3a83c7.docx]

## 骨科护理教学能力评价表

Orthopedic Nursing Teaching Competency Evaluation Form

**课程名称/Course Name:**

**评价方式/Evaluation Method:**

**□教师评价/Teacher evaluation  □临床导师/Clinical mentor evaluation**

**评价时间/Evaluation Date: 年/Year 月/Month 日/Day**

| **评价维度Evaluation Dimension** | **评价指标**  **Assessment Criteria** | **分值**  **Score** | **评分等级**  **Rating Scale** |
| --- | --- | --- | --- |
| **学习兴趣•Learning Interest** | 1. 主动参与骨科护理病例讨论   **Actively participates in orthopedic case discussions** | □1 □2 □3 | □I级：7-9分  Grade I:7-9 points  □II级：4-6分  Grade II:4-6 points  □III级：1-3分  Grade III:1-3 points |
| 1. 关注骨科术后康复新进展   Follows new advances in postoperative rehabilitation | □1 □2 □3 |
| 1. 自愿拓展阅读专科文献   Voluntarily reads specialized literature | □1 □2 □3 |
| **临床思维能力•Cognitive Abilities** | 1. 准确评估脊柱/关节患者护理问题   Accurately identifies nursing issues in spinal/joint patients | □1 □2 □3 | □I级：7-9分  Grade I:7-9 points  □II级：4-6分  Grade II:4-6 points  □III级：1-3分  Grade III:1-3 points |
| 1. 制定个性化康复计划   Develops personalized rehabilitation plans | □1 □2 □3 |
| 1. 预见性处理术后并发症   Anticipates postoperative complications | □1 □2 □3 |
| **自主学习能力•Self-Learning Abilities** | 1. 熟练使用骨科护理指南数据库   Proficiently uses orthopedic nursing guideline databases | □1 □2 □3 | □I级：7-9分  Grade I:7-9 points  □II级：4-6分  Grade II:4-6 points  □III级：1-3分  Grade III:1-3 points |
| 1. 独立完成石膏固定/牵引操作练习   Independently practices cast immobilization/traction techniques | □1 □2 □3 |
| 1. 按时提交护理记录作业   Submits nursing documentation on time | □1 □2 □3 |
| **团队协作能力•Communication and Collaboration Skills** | 1. 与医生/康复师有效沟通   Communicates effectively with physicians/rehabilitation therapists | □1 □2 □3 | □I级：7-9分  Grade I:7-9 points  □II级：4-6分  Grade II:4-6 points  □III级：1-3分  Grade III:1-3 points |
| 1. 在MDT团队中清晰表达护理观点   Articulates nursing perspectives in MDT teams | □1 □2 □3 |
| 1. 协助新护士掌握骨科专科操作   Assists new nurses in mastering specialized procedures | □1 □2 □3 |
| **总结归纳能力•Summarization and Synthesis Abilities** | 1. 规范书写骨科护理病历   Documents orthopedic nursing records compliantly | □1 □2 □3 | □I级：7-9分  Grade I:7-9 points  □II级：4-6分  Grade II:4-6 points  □III级：1-3分  Grade III:1-3 points |
| 1. 提炼护理查房核心问题   Identifies core issues during nursing rounds | □1 □2 □3 |
| 1. 制作图文并茂的健康科普材料   Creates illustrated patient education materials | □1 □2 □3 |
| **备注：**   1. 评分细则说明：按照“3、2、1”打分法进行打分，最高分为3分，最低分为1分，同一个条目分数累加，为此条目的总分。   Scoring Guidelines: The evaluation follows a “3-2-1” scoring system, where the maximum score for each criterion is 3 points and the minimum is 1 point. Sum all scores under the same item to calculate the total score for that item.   1. 分级：根据总分进行等级评定  - I级：7-9分，能力改善   Grade I:7-9 points, Improvement   - II级：4-6分，不确定是否能力改善   Grade II:4-6 points, Improvement Unclear   - III级：1-3分，未能力改善   Grade III:1-3 points, No Improvement | | | |
